# Supplementary material
Source: publisher site journal article supplement (https://www.dovepress.com/article/471841)
Supplement: Supplementary file 1 [file get_supplementary_file.php]

**Supplement Table 1.** Baseline characteristics of participants by NIHSS scores

| **Characteristics** | **NIHSS scores** | | ***P*-value** |
| --- | --- | --- | --- |
| **＜15** | **≥15** |
| **Basic information** |  |  |  |
| N | 349 | 82 |  |
| Sex (men) (%) | 180 (51.58) | 52 (63.41) | 0.053 |
| Age (years) | 73.47 ± 10.93 | 71.29 ± 10.33 | 0.102 |
| disease duration | 7.00 (3.50-16.00) | 8.00 (4.00-21.00) | 0.100 |
| NIHSS score | 7.28 ± 3.63 | 17.02 ± 1.59 | <0.001 |
| **Medical history** |  |  |  |
| Hypertension (%) | 309 (88.54) | 73 (89.02) | 0.901 |
| Diabetes (%) | 102 (29.23) | 47 (57.32) | <0.001 |
| CHD (%) | 100 (28.65) | 19 (23.17) | 0.318 |
| AF (%) | 14 (4.01) | 0 (0.00) | 0.065 |
| **Medication use before admission** |  |  |  |
| Antihypertensive drugs (%) | 292 (83.67) | 68 (82.93) | 0.871 |
| Lipid lowering drugs (%) | 134 (38.40) | 35 (42.68) | 0.474 |
| Antidiabetic drugs (%) | 96 (27.51) | 43 (52.44) | <0.001 |
| Anticoagulant drugs (%) | 7 (2.01) | 0 (0.00) | 0.196 |
| Antiplatelet drugs (%) | 297 (85.10) | 72 (87.80) | 0.530 |
| **OCSP classification** |  |  |  |
| TACI (%) | 41 (11.75) | 7 (8.54) | 0.406 |
| PACI (%) | 107 (30.66) | 24 (29.27) | 0.805 |
| POCI (%) | 65 (18.62) | 17 (20.73) | 0.662 |
| LACI (%) | 136 (38.97) | 34 (41.46) | 0.677 |
| **Blood routine indicators** |  |  |  |
| WBC (109/L) | 7.06 ± 2.42 | 7.27 ± 2.13 | 0.460 |
| RBC (1012/L) | 4.34 ± 0.62 | 4.64 ± 0.60 | <0.001 |
| PLT (109/L) | 225.56 ± 71.87 | 197.55 ± 49.84 | <0.001 |
| MPV (fL) | 9.77 ± 1.14 | 10.61 ± 1.18 | <0.001 |
| PDW (fL) | 16.08 ± 0.35 | 16.41 ± 0.30 | <0.001 |
| HGB(g/L) | 126.24 ± 21.25 | 137.10 ± 17.77 | <0.001 |
| **Blood biochemical indicators** |  |  |  |
| ALT(U/L) | 16.30 (11.30-23.40) | 18.35 (14.30-25.40) | 0.031 |
| TBIL (μmol/L) | 12.95 ± 7.71 | 14.49 ± 7.08 | 0.098 |
| Total protein (g/L) | 68.24 ± 7.53 | 69.99 ± 9.58 | 0.074 |
| UA (μmol/L) | 294.26 ± 105.11 | 275.26 ± 104.29 | 0.141 |
| Creatinine (μmol/L) | 80.87 ± 40.78 | 75.41 ± 26.76 | 0.248 |
| Urea (mmol/L) | 5.50 (4.50-6.90) | 5.30 (4.40-6.30) | 0.343 |
| HCY (μmol/L) | 14.00 (8.00-20.00) | 12.00 (8.00-19.00) | 0.476 |
| TC (mmol/L) | 4.38 ± 1.02 | 4.83 ± 1.19 | <0.001 |
| LDL-C (mmol/L) | 2.78 ± 0.95 | 3.10 ± 1.04 | 0.007 |
| HDL-C (mmol/L) | 1.25 ± 0.32 | 1.26 ± 0.39 | 0.852 |
| FBG (mmol/L) | 5.60 ± 1.27 | 8.18 ± 2.42 | <0.001 |
| Glycosylated hemoglobin (%) | 6.18 ± 0.87 | 7.05 ± 1.40 | <0.001 |
| **Clotting index** |  |  |  |
| INR | 0.95 ± 0.08 | 0.95 ± 0.09 | 0.511 |
| PT (second) | 27.54 ± 3.88 | 27.74 ± 3.94 | 0.684 |
| **Tumor index** |  |  |  |
| AFP (ng/ml) | 1.80 (1.00-2.80) | 1.95 (0.85-2.70) | 0.943 |
| CEA (ng/ml) | 1.47 (0.84-2.34) | 1.50 (1.18-2.30) | 0.212 |

**Abbreviations:** WBC: White blood cell, RBC: Red blood cell, PLT: Platelet, MPV: Mean platelet volume, PDW: Platelet distribution width, HGB: Hemoglobin, ALT: Alanine aminotransferase, TBIL: Total bilirubin, UA: Uric acid, HCY: Homocysteine, TC: Total cholesterol, LDL-C: Low density lipoprotein cholesterol, HDL-C: High density lipoprotein cholesterol, FBG: Fasting blood glucose, INR: International standard ratio, PT: Partial thromboplastin, AFP: Alpha fetoprotein, CEA: Carcinoembryonic antigen, TACI: Total anterior circulation infarction, PACI: Partial anterior circulation infarction, POCI: posterior circulation infarction, LACI: Lacunar infarction, CHD: Coronary heart disease, AF: Atrial fibrillation.

**Supplement Table 2.** Univariate analysis of NIHSS scores

| **Variable** | **Statistics** | **OR (95% CI)** | ***P-*value** |
| --- | --- | --- | --- |
| Sex (%) |  |  |  |
| Women | 199 (46.17) | ref |  |
| Men | 232 (53.83) | 1.20 (0.24, 2.15) | 0.014 |
| Age (years) | 73.06 ± 10.84 | -0.06 (-0.11, -0.02) | <0.001 |
| Diabetes (%) |  |  |  |
| No | 282 (65.43) | ref |  |
| Yes | 149 (34.57) | 2.76 (1.78, 3.73) | <0.001 |
| RBC (1012/L) | 4.39 ± 0.63 | 1.51 (0.76, 2.27) | <0.001 |
| PLT (109/L) | 220.23 ± 69.06 | -0.01 (-0.02, -0.01) | <0.001 |
| MPV (fL) | 9.93 ± 1.19 | 1.38 (1.00, 1.76) | <0.001 |
| PDW (fL) | 16.14 ± 0.36 | 6.20 (5.01, 7.38) | <0.001 |
| HGB(g/L) | 128.30 ± 21.05 | 0.05 (0.03, 0.08) | <0.001 |
| ALT(U/L) | 20.32 ± 14.62 | 0.03 (-0.00, 0.06) | 0.082 |
| TBIL (μmol/L) | 13.24 ± 7.61 | 0.05 (-0.01, 0.12) | 0.090 |
| TC (mmol/L) | 4.47 ± 1.07 | 1.06 (0.62, 1.49) | <0.001 |
| LDL-C (mmol/L) | 2.84 ± 0.97 | 0.92 (0.43, 1.40) | <0.001 |
| FBG (mmol/L) | 6.09 ± 1.85 | 1.64 (1.44, 1.85) | <0.001 |
| Hemoglobin (%) | 6.34 ± 1.05 | 1.72 (1.29, 2.15) | <0.001 |
| Antidiabetic drugs (%) |  |  |  |
| No | 292 (67.75) | ref |  |
| Yes | 139 (32.25) | 2.52 (1.52, 3.52) | <0.001 |

**Supplement Table 3.** Hierarchical analysis on relationship of FBG and NIHSS

| **Hierarchical factor** | | **N** | ***β* (95% CI) *p*** | ***p* for interaction** |
| --- | --- | --- | --- | --- |
| Sex (%) | Women | 199 | 1.63 (1.32, 1.95) <0.001 | 0.209 |
|  | Men | 232 | 1.39 (1.12, 1.66) <0.001 |
| Age (years) | ≤85 | 387 | 1.49 (1.23, 1.76) <0.001 | 0.220 |
|  | >85 | 44 | 1.96 (1.24, 2.69) <0.001 |
| RBC (1012/L) | ≤4 | 112 | 1.71 (1.18, 2.25) <0.001 | 0.365 |
|  | >4 | 319 | 1.45 (1.21, 1.68) <0.001 |
| PLT (109/L) | ≤208 | 215 | 1.57 (1.27, 1.87) <0.001 | 0.488 |
|  | >208 | 216 | 1.43 (1.15, 1.72) <0.001 |
| HGB (g/L) | ≤129 | 210 | 1.73 (1.34, 2.12) <0.001 | 0.127 |
|  | >129 | 221 | 1.39 (1.14, 1.64) <0.001 |
| TC (mmol/L) | ≤5.2 | 322 | 1.51 (1.26, 1.76) <0.001 | 0.732 |
|  | >5.2 | 109 | 1.44 (1.08, 1.80) <0.001 |
| LDL-C (mmol/L) | ≤1.8 | 62 | 1.54 (0.93, 2.15) <0.001 | 0.856 |
|  | >1.8 | 369 | 1.48 (1.26, 1.71) <0.001 |
| PDW (fL) | ≤16.1 | 210 | 1.51 (1.13, 1.90) <0.001 | 0.905 |
|  | >16.1 | 221 | 1.49 (1.23, 1.74) <0.001 |
| Antidiabetic drugs (%) | No | 292 | 2.26 (1.86, 2.66) <0.001 | 0.051 |
|  | Yes | 139 | 1.40 (1.12, 1.67) <0.001 |

Each stratification adjusted for all the factors (sex, age, RBC, PLT, HGB, TC, LDL-C, PDW, and antidiabetic drugs) except the stratification factor itself.

**Supplement Table 4.** Sensitivity analysis on relationship of FBG levels and NIHSS scores

| **Variable** | **Model 1 (unadjusted)** | | **Model 2 (adjusted)** | | **Model 3 (adjusted)** | |
| --- | --- | --- | --- | --- | --- | --- |
| **N** | ***β* (95% CI) *p*** | **N** | ***β* (95% CI) *p*** | **N** | ***β* (95% CI) *p*** |
| All patients | 431 | 1.64 (1.44, 1.85) <0.01 | 431 | 1.62 (1.41, 18.3) <0.01 | 431 | 1.49 (1.27, 1.71) <0.01 |
| Hypertension | 382 | 1.71 (1.50, 1.92) <0.01 | 382 | 1.69 (1.47, 1.90) <0.01 | 382 | 1.55 (1.32, 1.77) <0.01 |
| Diabetes | 149 | 1.41 (1.12, 1.70) <0.01 | 149 | 1.38 (1.09, 1.68) <0.01 | 149 | 1.29 (0.98, 1.61) <0.01 |
| Non-CHD | 312 | 1.67 (1.44, 1.91) <0.01 | 312 | 1.65 (1.41, 1.89) <0.01 | 312 | 1.70 (1.43, 1.97) <0.01 |

Model 1: unadjusted

Model 2: adjusted for sex and age.

Model 3: adjusted for sex, age, RBC, PLT, HGB, TC, LDL-C, PDW, and antidiabetic drug.

**Supplement Table 5.** Baseline characteristics of participants by PDW levels

| **Characteristics** | **PDW levels (fL)** | | ***P*-value** |
| --- | --- | --- | --- |
| **≤16.1** | **＞16.1** |
| **Basic information** |  |  |  |
| N | 210 | 221 |  |
| Sex (men) (%) | 99 (47.14) | 133 (60.18) | 0.007 |
| Age (years) | 74.25 ± 10.36 | 71.92 ± 11.19 | 0.026 |
| disease duration | 6.00 (4.00-11.00) | 8.00 (4.00-21.00) | 0.008 |
| NIHSS score | 6.94 ± 3.97 | 11.22 ± 5.14 | <0.001 |
| **Medical history** |  |  |  |
| Hypertension (%) | 184 (87.62) | 198 (89.59) | 0.519 |
| Diabetes (%) | 59 (28.10) | 90 (40.72) | 0.006 |
| CHD (%) | 62 (29.52) | 57 (25.79) | 0.386 |
| AF (%) | 8 (3.81) | 6 (2.71) | 0.522 |
| **Medication use before admission** |  |  |  |
| Antihypertensive drugs (%) | 176 (83.81) | 184 (83.26) | 0.877 |
| Lipid lowering drugs (%) | 73 (34.76) | 96 (43.44) | 0.065 |
| Antidiabetic drugs (%) | 57 (27.14) | 82 (37.10) | 0.027 |
| Anticoagulant drugs (%) | 3 (1.43) | 4 (1.81) | 0.754 |
| Antiplatelet drugs (%) | 182 (86.67) | 187 (84.62) | 0.544 |
| **OCSP classification** |  |  |  |
| TACI (%) | 25 (11.90) | 23 (10.41) | 0.621 |
| PACI (%) | 62 (29.52) | 69 (31.22) | 0.702 |
| POCI (%) | 36 (17.14) | 46 (20.81) | 0.332 |
| LACI (%) | 87 (41.43) | 83 (37.56) | 0.411 |
| **Blood routine indicators** |  |  |  |
| WBC (109/L) | 7.03 ± 2.36 | 7.17 ± 2.38 | 0.537 |
| RBC (1012/L) | 4.26 ± 0.62 | 4.52 ± 0.60 | <0.001 |
| PLT (109/L) | 246.06 ± 73.97 | 195.68 ± 53.67 | <0.001 |
| MPV (fL) | 9.17 ± 0.85 | 10.65 ± 1.00 | <0.001 |
| PDW (fL) | 15.85 ± 0.22 | 16.43 ± 0.22 | <0.001 |
| HGB(g/L) | 122.48 ± 21.84 | 133.84 ± 18.71 | <0.001 |
| **Blood biochemical indicators** |  |  |  |
| ALT(U/L) | 15.85 (11.05-22.50) | 17.70 (13.10-25.30) | 0.005 |
| TBIL (μmol/L) | 11.10 (8.25-14.28) | 12.50 (9.10-17.20) | 0.002 |
| Total protein (g/L) | 67.36 ± 7.49 | 69.72 ± 8.26 | 0.002 |
| UA (μmol/L) | 281.70 ± 108.58 | 299.15 ± 101.19 | 0.085 |
| Creatinine (μmol/L) | 81.81 ± 45.25 | 77.95 ± 30.84 | 0.299 |
| Urea (mmol/L) | 5.45 (4.10-7.00) | 5.50 (4.80-6.53) | 0.306 |
| HCY (μmol/L) | 14.00 (7.00-20.00) | 14.00 (8.00-20.00) | 0.718 |
| TC (mmol/L) | 4.11 ± 0.88 | 4.81 ± 1.12 | <0.001 |
| LDL-C (mmol/L) | 2.58 ± 0.85 | 3.08 ± 1.02 | <0.001 |
| HDL-C (mmol/L) | 1.21 ± 0.32 | 1.29 ± 0.35 | 0.022 |
| FBG (mmol/L) | 5.67 ± 1.38 | 6.48 ± 2.14 | <0.001 |
| Glycosylated hemoglobin (%) | 6.15 ± 0.76 | 6.53 ± 1.23 | <0.001 |
| **Clotting index** |  |  |  |
| INR | 0.95 ± 0.08 | 0.95 ± 0.08 | 0.775 |
| PT (second) | 27.74 ± 3.96 | 27.43 ± 3.82 | 0.422 |
| **Tumor index** |  |  |  |
| AFP (ng/ml) | 1.90 (1.10-2.70) | 1.70 (0.80-2.90) | 0.294 |
| CEA (ng/ml) | 1.45 (0.87-2.23) | 1.50 (0.89-2.41) | 0.483 |

**Abbreviations:** WBC: White blood cell, RBC: Red blood cell, PLT: Platelet, MPV: Mean platelet volume, PDW: Platelet distribution width, HGB: Hemoglobin, ALT: Alanine aminotransferase, TBIL: Total bilirubin, UA: Uric acid, HCY: Homocysteine, TC: Total cholesterol, LDL-C: Low density lipoprotein cholesterol, HDL-C: High density lipoprotein cholesterol, FBG: Fasting blood glucose, INR: International standard ratio, PT: Partial thromboplastin, AFP: Alpha fetoprotein, CEA: Carcinoembryonic antigen, TACI: Total anterior circulation infarction, PACI: Partial anterior circulation infarction, POCI: posterior circulation infarction, LACI: Lacunar infarction, CHD: Coronary heart disease, AF: Atrial fibrillation.

**Supplement Table 6.** Univariate analysis of PDW levels

| **Variable** | **Statistics** | **OR (95% CI)** | ***P-*value** |
| --- | --- | --- | --- |
| Sex (%) |  |  |  |
| Women | 199 (46.17) | ref |  |
| Men | 232 (53.83) | 0.13 (0.06, 0.19) | <0.001 |
| Age (years) | 73.06 ± 10.84 | 0.00 (-0.01, 0.00) | 0.058 |
| Disease duration (hours) | 11.47 ± 10.93 | 0.01 (0.00, 0.01) | 0.004 |
| Diabetes (%) |  |  |  |
| No | 282 (65.43) | ref |  |
| Yes | 149 (34.57) | 0.10 (0.03, 0.17) | 0.008 |
| CHD (%) |  |  |  |
| No | 312 (72.39) | ref |  |
| Yes | 119 (27.61) | 0.02 (0.01, 0.03) | 0.009 |
| RBC (1012/L) | 4.39 ± 0.63 | 0.11 (0.06, 0.17) | <0.001 |
| PLT (109/L) | 220.23 ± 69.06 | 0.01 (0.01, 0.02) | <0.001 |
| LDL-C (mmol/L) | 2.84 ± 0.97 | 0.13 (0.10, 0.16) | <0.001 |
| TC (mmol/L) | 4.47 ± 1.07 | 0.14 (0.11, 0.17) | <0.001 |
| TBIL (μmol/L) | 13.24 ± 7.61 | 0.01 (0.00, 0.01) | <0.001 |
| Creatinine (μmol/L) | 79.83 ± 38.54 | 0.02 (0.01, 0.03) | 0.003 |
| UA (μmol/L) | 4.88 ± 1.77 | 0.03 (0.01, 0.05) | 0.002 |
| FBG (mmol/L) | 6.09 ± 1.85 | 0.04 (0.02, 0.06) | <0.001 |
| Lipid lowering drugs (%) |  |  |  |
| No | 262 (60.79) | ref |  |
| Yes | 169 (39.21) | 0.10 (0.03, 0.17) | 0.005 |
| Antidiabetic drugs (%) |  |  |  |
| No | 292 (67.75) | ref |  |
| Yes | 139 (32.25) | 0.09 (0.01, 0.16) | 0.021 |
| Antiplatelet drugs (%) |  |  |  |
| No | 62 (14.39) | ref |  |
| Yes | 369 (85.61) | -0.09 (-0.11, -0.09) | 0.007 |

**Supplement Table 7.** Hierarchical analysis on relationship of FBG and PDW

| **Hierarchical factor** | | **N** | ***β* (95% CI) *p*** | ***p* for interaction** |
| --- | --- | --- | --- | --- |
| Sex (%) | Women | 199 | 0.02 (-0.00, 0.05) 0.070 | 0.983 |
|  | Men | 232 | 0.02 (0.00, 0.04) 0.033 |
| Age (years) | ≤85 | 387 | 0.02 (0.01, 0.04) 0.006 | 0.420 |
|  | >85 | 44 | 0.00 (-0.05, 0.06) 0.959 |
| Disease duration (hours) | ≤4.5 | 133 | 0.01 (-0.02, 0.04) 0.385 | 0.447 |
|  | >4.5 | 298 | 0.03 (0.01, 0.04) 0.013 |
| Diabetes (%) | No | 282 | 0.01 (-0.02, 0.04) 0.399 | 0.443 |
|  | Yes | 149 | 0.03 (0.01, 0.05) 0.009 |
| CHD (%) | No | 312 | 0.02 (0.01, 0.04) 0.013 | 0.733 |
|  | Yes | 119 | 0.02 (-0.01, 0.05) 0.238 |
| RBC (1012/L) | ≤4 | 112 | -0.00 (-0.04, 0.04) 0.915 | 0.162 |
|  | >4 | 319 | 0.03 (0.01, 0.05) 0.002 |
| PLT (109/L) | ≤208 | 215 | 0.02 (-0.00, 0.05) 0.095 | 0.588 |
|  | >208 | 216 | 0.03 (0.01, 0.05) 0.012 |
| LDL-C (mmol/L) | ≤1.8 | 62 | 0.04 (-0.01, 0.08) 0.086 | 0.427 |
|  | >1.8 | 369 | 0.02 (0.00, 0.04) 0.022 |
| TC (mmol/L) | ≤5.2 | 322 | 0.03 (0.01, 0.05) 0.009 | 0.762 |
|  | >5.2 | 109 | 0.02 (-0.01, 0.05) 0.132 |
| TBIL (μmol/L) | ≤17.1 | 346 | 0.02 (0.01, 0.04) 0.010 | 0.386 |
|  | >17.1 | 85 | 0.01 (-0.02, 0.04) 0.477 |
| Creatinine (μmol/L) | ≤71 | 204 | 0.02 (-0.00, 0.04) 0.061 | 0.721 |
|  | >71 | 227 | 0.03 (-0.00, 0.05) 0.053 |
| UA (μmol/L) | ≤360 | 324 | 0.02 (0.00, 0.04) 0.021 | 0.981 |
|  | >360 | 107 | 0.02 (-0.01, 0.06) 0.202 |
| Lipid lowering drugs (%) | No | 262 | 0.03 (0.01, 0.05) 0.007 | 0.295 |
|  | Yes | 169 | 0.01 (-0.01, 0.04) 0.237 |
| Antidiabetic drugs (%) | No | 292 | 0.02 (-0.01, 0.05) 0.288 | 0.587 |
|  | Yes | 139 | 0.03 (0.01, 0.05) 0.013 |
| Antiplatelet drugs (%) | No | 62 | 0.02 (-0.03, 0.07) 0.433 | 0.881 |
|  | Yes | 369 | 0.02 (0.01, 0.04) 0.011 |

Each stratification adjusted for all the factors (sex, age, disease duration, diabetes, CHD, RBC, PLT, LDL-C, TC, TBIL, creatinine, UA, lipid lowering drugs, antidiabetic drugs, and antiplatelet drugs) except the stratification factor itself.

**Supplement Table 8.** Sensitivity analysis on relationship of FBG levels and PDW levels

| **Variable** | **Model 1 (unadjusted)** | | **Model 2 (adjusted)** | | **Model 3 (adjusted)** | |
| --- | --- | --- | --- | --- | --- | --- |
| **N** | **β (95% CI) *p*** | **N** | ***β* (95% CI) *p*** | **N** | ***β* (95% CI) *p*** |
| All patients | 431 | 0.04 (0.02, 0.06) <0.01 | 431 | 0.04 (0.02, 0.06) <0.01 | 431 | 0.02 (0.01, 0.04) <0.01 |
| Hypertension | 382 | 0.05 (0.03, 0.07) <0.01 | 382 | 0.05 (0.03, 0.07) <0.01 | 382 | 0.03 (0.01, 0.05) <0.01 |
| Diabetes | 149 | 0.04 (0.02, 0.07) <0.01 | 149 | 0.04 (0.02, 0.06) <0.01 | 149 | 0.03 (0.01, 0.05)  0.01 |
| Non-CHD | 312 | 0.04 (0.02, 0.06) <0.01 | 312 | 0.04 (0.02, 0.06) <0.01 | 312 | 0.03(0.01, 0.05) <0.01 |

Model 1: unadjusted

Model 2: adjusted for sex and age.

Model 3: adjusted for sex, age, disease duration, diabetes, CHD, RBC, PLT, LDL-C, TC, TBIL, Creatinine, UA, lipid lowering drugs, antidiabetic drugs, and antiplatelet drugs.

**Supplement Table 9.** Hierarchical analysis on relationship of PDW and NIHSS

| **Hierarchical factor** | | **N** | ***β* (95% CI) *p*** | ***p* for interaction** |
| --- | --- | --- | --- | --- |
| Sex (%) | Women | 199 | 4.48 (2.69, 6.28) <0.01 | 0.815 |
|  | Men | 232 | 4.24 (2.76, 5.72) <0.01 |
| Age (years) | ≤85 | 387 | 4.82 (3.49, 6.16) <0.001 | 0.056 |
|  | >85 | 44 | 1.96 (-0.84, 4.76) 0.171 |
| RBC (1012/L) | ≤4 | 112 | 4.39 (2.50, 6.28) <0.001 | 0.935 |
|  | >4 | 319 | 4.31 (2.86, 5.76) <0.001 |
| PLT (109/L) | ≤208 | 215 | 4.50 (2.96, 6.05) <0.001 | 0.601 |
|  | >208 | 216 | 3.93 (2.22, 5.65) <0.001 |
| HGB (g/L) | ≤129 | 210 | 3.95 (2.39, 5.51) <0.001 | 0.482 |
|  | >129 | 221 | 4.66 (3.00, 6.33) <0.001 |
| TC (mmol/L) | ≤5.2 | 322 | 4.46 (3.07, 5.84) <0.001 | 0.721 |
|  | >5.2 | 109 | 4.00 (1.71, 6.29) <0.001 |
| LDL-C (mmol/L) | ≤1.8 | 62 | 6.44 (3.94, 8.95) <0.001 | 0.055 |
|  | >1.8 | 369 | 3.86 (2.51, 5.21) <0.001 |
| FBG (mmol/L) | ≤6.1 | 282 | 3.96 (2.54, 5.39) <0.001 | 0.013 |
|  | >6.1 | 149 | 6.70 (4.71, 8.70) <0.001 |
| Antidiabetic drugs (%) | No | 292 | 4.53 (3.12, 5.93) <0.001 | 0.537 |
|  | Yes | 139 | 3.86 (1.89, 5.83) <0.001 |

Each stratification adjusted for all the factors (sex, age, RBC, PLT, HGB, TC, LDL-C, FBG, and antidiabetic drugs) except the stratification factor itself.

**Supplement Table 10.** Sensitivity analysis on relationship of PDW levels and NIHSS scores

| **Variable** | **Model 1 (unadjusted)** | | **Model 2 (adjusted)** | | **Model 3 (adjusted)** | |
| --- | --- | --- | --- | --- | --- | --- |
| **N** | ***β* (95% CI) *p*** | **N** | ***β* (95% CI) *p*** | **N** | ***β* (95% CI) *p*** |
| All patients | 431 | 6.20 (5.01, 7.38) <0.01 | 431 | 6.04 (4.84, 7.24) <0.01 | 431 | 4.33 (3.07, 5.59) <0.01 |
| Hypertension | 382 | 6.30 (5.06, 7.55) <0.01 | 382 | 6.20 (4.95, 7.46) <0.01 | 382 | 3.93 (2.63, 5.23) <0.01 |
| Diabetes | 149 | 7.25 (5.08, 9.42) <0.01 | 149 | 7.02 (4.78, 9.26) <0.01 | 149 | 4.09(1.68, 6.51) <0.01 |
| Non-CHD | 312 | 5.76 (4.27, 7.24) <0.01 | 312 | 5.55(4.05, 7.05) <0.01 | 312 | 3.50(1.95, 5.04) <0.01 |

Model 1: unadjusted

Model 2: adjusted for sex and age.

Model 3: adjusted for sex, age, RBC, PLT, HGB, TC, LDL-C, FBG, and antidiabetic drugs.

**Supplement Table 11.** Mediation analysis results (n=431)

|  | **NIHSS scores** | | | | | **PDW** | | | | | **NIHSS scores** | | | | |
| --- | --- | --- | --- | --- | --- | --- | --- | --- | --- | --- | --- | --- | --- | --- | --- |
| ***B*** | ***SE*** | ***t*** | ***p*** | ***β*** | ***B*** | ***SE*** | ***t*** | ***p*** | ***β*** | ***B*** | ***SE*** | ***t*** | ***p*** | ***β*** |
| Constant | 1.119 | 2.822 | 0.396 | 0.692 | - | 15.766** | 0.204 | 77.350 | <0.001 | - | -67.176** | 10.466 | -6.419 | <0.001 | - |
| sex | 0.253 | 0.430 | 0.589 | 0.556 | 0.025 | 0.014 | 0.031 | 0.462 | 0.645 | 0.020 | 0.191 | 0.409 | 0.468 | 0.640 | 0.019 |
| age | -0.027 | 0.020 | -1.312 | 0.190 | -0.057 | -0.001 | 0.001 | -0.371 | 0.711 | -0.016 | -0.024 | 0.019 | -1.257 | 0.209 | -0.052 |
| RBC | -0.085 | 0.643 | -0.133 | 0.895 | -0.011 | -0.031 | 0.046 | -0.663 | 0.508 | -0.053 | 0.048 | 0.612 | 0.079 | 0.937 | 0.006 |
| PLT | -0.012** | 0.003 | -3.854 | <0.001 | -0.157 | -0.002** | <0.001 | -10.053 | <0.001 | -0.412 | -0.002 | 0.003 | -0.669 | 0.504 | -0.029 |
| HGB | 0.005 | 0.020 | 0.254 | 0.799 | 0.021 | 0.004* | 0.001 | 2.516 | 0.012 | 0.211 | -0.011 | 0.019 | -0.556 | 0.578 | -0.044 |
| TC | 0.808* | 0.405 | 1.995 | 0.047 | 0.170 | 0.109** | 0.029 | 3.711 | <0.001 | 0.319 | 0.338 | 0.391 | 0.864 | 0.388 | 0.071 |
| LDL-C | -0.384 | 0.439 | -0.875 | 0.382 | -0.074 | -0.024 | 0.032 | -0.759 | 0.448 | -0.064 | -0.280 | 0.418 | -0.670 | 0.503 | -0.054 |
| Antidiabetic drugs | -0.245 | 0.451 | -0.544 | 0.587 | -0.023 | 0.026 | 0.033 | 0.803 | 0.422 | 0.034 | -0.359 | 0.429 | -0.836 | 0.404 | -0.033 |
| FBG | 1.584** | 0.117 | 13.580 | <0.001 | 0.578 | 0.022* | 0.008 | 2.566 | 0.011 | 0.110 | 1.490** | 0.112 | 13.333 | <0.001 | 0.544 |
| PDW |  |  |  |  |  |  |  |  |  |  | 4.332** | 0.642 | 6.751 | <0.001 | 0.310 |
| *R* 2 | 0.411 | | | | | 0.401 | | | | | 0.469 | | | | |
| Adjusted *R* 2 | 0.399 | | | | | 0.388 | | | | | 0.456 | | | | |
| *F*-value | *F* (9,421) =32.668, *p*=<0.001 | | | | | *F* (9,421) =31.260, *p*=<0.001 | | | | | *F* (10,420) =37.072, *p*=<0.001 | | | | |
|  | | | | | | | | | | | | | | | |

* *p*<0.05 ** *p*<0.01

*B*: regression coefficient, *SE*: standard error, *t*: t-value, *p*: *p*-value, *β*: standardized coefficient. Significant p-values (*p*<0.05, *p*<0.01) indicate statistically significant relationships. *R* 2 and Adjusted *R* 2 values indicate the proportion of variance explained by the model, with F-value indicating the overall significance of the model.

The mediation effect model is divided into three types of regression models: The first is the regression model between the independent variable FBG and the dependent variable NIHSS scores; the second is the regression model between the independent variable FBG and the mediator variable PDW; the third is the regression model involving both the independent variable FBG and the mediator variable PDW with the dependent variable NIHSS scores.

**Supplement Table 12.** Chain mediating role of PDW in relationship between FBG and NIHSS

| **Item** | **Symbol** | **Meaning** | **Effect Value** | **95% CI** | | ***Z*/*t* -value** | ***P*-value** | **Conclusion** |
| --- | --- | --- | --- | --- | --- | --- | --- | --- |
| **Lower** | **Upper** |
| FBG→PDW→NIHSS scores | a*b | Indirect Effect | 0.094 | 0.010 | 0.060 | 7.192 | <0.001 | Partial  Mediation |
| FBG→PDW | a | X→M | 0.022 | 0.005 | 0.038 | 2.566 | 0.011 |
| PDW→NIHSS scores | b | M→Y | 4.332 | 3.074 | 5.589 | 6.751 | <0.001 |
| FBG→NIHSS scores | c' | Direct Effect | 1.490 | 1.271 | 1.709 | 13.333 | <0.001 |
| FBG→NIHSS scores | c | Total Effect | 1.584 | 1.355 | 1.812 | 13.580 | <0.001 |

a*b: represents the indirect effect, i.e., the impact of FBG on NIHSS scores through PDW. a: indicates the effect of FBG on PDW. b: indicates the effect of PDW on NIHSS scores. c': represents the direct effect of FBG on NIHSS scores. c: represents the total effect of FBG on NIHSS scores.

X: The independent variable FBG. M: The mediator variable PDW. Y: The dependent variable NIHSS scores.

| **Supplement Table 13. Moderation Effect Analysis Results (n=431)** | | | | | | | | | | | | | | | |
| --- | --- | --- | --- | --- | --- | --- | --- | --- | --- | --- | --- | --- | --- | --- | --- |
|  | **Model 1** | | | | | **Model 2** | | | | | **Model 3** | | | | |
| ***B*** | ***SE*** | ***t*** | ***p*** | ***β*** | ***B*** | ***SE*** | ***t*** | ***p*** | ***β*** | ***B*** | ***SE*** | ***t*** | ***p*** | ***β*** |
| Constant | 10.757 | 2.841 | 3.787 | <0.001** | - | 11.828 | 2.706 | 4.371 | 0.000** | - | 11.843 | 2.712 | 4.367 | <0.001** | - |
| sex | 0.253 | 0.430 | 0.589 | 0.556 | 0.025 | 0.191 | 0.409 | 0.468 | 0.640 | 0.019 | 0.190 | 0.409 | 0.464 | 0.643 | 0.019 |
| age | -0.027 | 0.020 | -1.312 | 0.190 | -0.057 | -0.024 | 0.019 | -1.257 | 0.209 | -0.052 | -0.024 | 0.019 | -1.256 | 0.210 | -0.052 |
| RBC | -0.085 | 0.643 | -0.133 | 0.895 | -0.011 | 0.048 | 0.612 | 0.079 | 0.937 | 0.006 | 0.043 | 0.614 | 0.070 | 0.944 | 0.005 |
| PLT | -0.012 | 0.003 | -3.854 | <0.001** | -0.157 | -0.002 | 0.003 | -0.669 | 0.504 | -0.029 | -0.002 | 0.003 | -0.674 | 0.501 | -0.029 |
| HGB | 0.005 | 0.020 | 0.254 | 0.799 | 0.021 | -0.011 | 0.019 | -0.556 | 0.578 | -0.044 | -0.011 | 0.019 | -0.548 | 0.584 | -0.044 |
| TC | 0.808 | 0.405 | 1.995 | 0.047* | 0.170 | 0.338 | 0.391 | 0.864 | 0.388 | 0.071 | 0.334 | 0.393 | 0.851 | 0.395 | 0.070 |
| LDL-C | -0.384 | 0.439 | -0.875 | 0.382 | -0.074 | -0.280 | 0.418 | -0.670 | 0.503 | -0.054 | -0.277 | 0.419 | -0.662 | 0.508 | -0.053 |
| Antidiabetic drugs | -0.245 | 0.451 | -0.544 | 0.587 | -0.023 | -0.359 | 0.429 | -0.836 | 0.404 | -0.033 | -0.361 | 0.430 | -0.839 | 0.402 | -0.033 |
| FBG | 1.584 | 0.117 | 13.580 | <0.001** | 0.578 | 1.490 | 0.112 | 13.333 | <0.001** | 0.544 | 1.486 | 0.118 | 12.564 | <0.001** | 0.542 |
| PDW |  |  |  |  |  | 4.332 | 0.642 | 6.751 | <0.001** | 0.310 | 4.339 | 0.645 | 6.724 | <0.001** | 0.311 |
| FBG * PDW |  |  |  |  |  |  |  |  |  |  | 0.036 | 0.311 | 0.116 | 0.908 | 0.005 |
| *R* 2 | 0.411 | | | | | 0.469 | | | | | 0.469 | | | | |
| Adjusted *R* 2 | 0.399 | | | | | 0.456 | | | | | 0.455 | | | | |
| *F*-value | *F* (9,421) =32.668, *p*=<0.001 | | | | | *F* (10,420) =37.072, *p*=<0.001 | | | | | *F* (11,419) =33.624, *p*=<0.001 | | | | |
| *R* 2 | 0.411 | | | | | 0.058 | | | | | <0.001 | | | | |
| *F*-value | *F* (9,421) =32.668, *p*=<0.001 | | | | | *F* (1,420) =45.578, *p*=<0.001 | | | | | *F* (1,419) =0.014, *p*=0.908 | | | | |
|  | | | | | | | | | | | | | | | |

Dependent variable：NIHSS scores. * *p*<0.05 ** *p*<0.01

*B*: regression coefficient, *SE*: standard error, *t*: t-value, p: p-value, *β*: standardized coefficient. Significant p-values (*p*<0.05, *p*<0.01) indicate statistically significant relationships. *R* 2 and Adjusted *R* 2 values indicate the proportion of variance explained by the model, with F-value indicating the overall significance of the model.

The study of moderation effects is divided into three models： Model 1 analyzes the impact of the independent variable FBG on the dependent variable NIHSS scores, without considering any moderating variables. Model 2 builds upon Model 1 by including the moderating variable PDW. Model 3 extends Model 2 by adding an interaction term between the independent variable FBG and the moderating variable PDW.

| **Supplement Table 14. Simple slope analysis** | | | | | | |
| --- | --- | --- | --- | --- | --- | --- |
| **Level of Moderating Variable** | ***B*** | ***SE*** | ***t*** | ***p*** | **95% CI** | |
| Mean Value | 1.486 | 0.118 | 12.564 | <0.001 | 1.254 | 1.717 |
| High Level（+1SD） | 1.499 | 0.135 | 11.127 | <0.001 | 1.235 | 1.763 |
| Low Level（-1SD） | 1.472 | 0.188 | 7.820 | <0.001 | 1.103 | 1.841 |

*B*: regression coefficient, *SE*: standard error, *t*: t-value, p: p-value
